# Supplementary material for: Metabolomic Associations of Asthma in the Hispanic Community Health Study/Study of Latinos
Source: MDPI journal article supplement (doi:10.3390/metabo12040359), 2022-04-16
Supplement: s1 [file s1]

## Supplementary Materials

Supplementary methods

Figure S1: (a) Clustering dendrograms of metabolites; (b) eigengene dendrogram

Figure S2: Module-trait relationship heatmap

Figure S3: Over-representation analysis of the 40 metabolites in Green module

Figure S4: (a) Outliers detection by *SampleTree* function of WGCNA;  
(b)&(c) analysis of network topology for a set of soft-thresholding powers

Table S1: Demographic Characteristics of the Samples in Study Used for the Heatmap of the Pearson Correlation Test

Table S2: The number of metabolites in 12 modules

Table S3: Association between colored modules and asthma

Table S4: Pathways and metabolites classification of green module

Table S5: Over-representation analysis of the 40 metabolites in green module

Table S6: Stratification analysis of green module and 1-arachidonoyl-GPA (20:4) by sex and Hispanic/Latino backgrounds

Table S7: Interaction Effects of green module and 1-arachidonoyl-GPA (20:4) by sex and Hispanic/Latino backgrounds

Table S8: The List of 1-arachidonoyl-GPA (20:4) and 40 Metabolites in Green Module by LC/MS Analysis

Table S9: Scale-free metrics resulting from *pickSoftThreshold* function of WGCNA

## Supplementary methods

Fasting serum samples were collected from the HCHS/SOL baseline visit for metabolomic profiling and stored at -70 °C since collection. The profiling was performed at Metabolon (Durham, NC) using Discovery HD4 platform in 2017 [1].

### A. Mass spectrometry analysis

The collected serum samples were extracted with methanol and analyzed using ultra-performance liquid chromatography (UPLC)-MS/MS for non-targeted mass spectrometry (MS) [2]. All techniques used a Waters ACQUITY UPLC and a Thermo Scientific Q-Exactive high resolution/accurate mass spectrometer using heated electrospray ionization (HESI-II) source and an Orbitrap mass analyzer with a 35,000-mass resolution.

Four methods proceeded after the process of drying the sample extracts and rehydrating them in solvents to make the samples compatible [3].

- (1) Acidic positive ion conditions: Water and methanol were used to gradient elute the extract from a C18 column (Waters UPLC BEH C18-2.1x100 mm, 1.7  $\mu$ m) containing 0.05% perfluoropentanoic acid (PFPA) and 0.1% formic acid (FA).
- (2) Acidic positive ion conditions: The extract was gradient eluted from the same C18 column using methanol, acetonitrile, water, 0.05% PFPA, and 0.01% FA at a higher total organic content.
- (3) Negative ion conditions: For this aliquot, a separate dedicated C18 column was used. Water and methanol were used to gradient elute the extract from the column, and the solution was with 6.5mM Ammonium Bicarbonate at pH 8.
- (4) Negative ion conditions: It was analyzed with elution from a HILIC column (Waters UPLC BEH Amide 2.1x150 mm, 1.7  $\mu$ m) while using a gradient consisting of water and acetonitrile with 10mM Ammonium Formate, pH 10.8. Using dynamic exclusion, the MS analysis alternated between MS and data-dependent MS<sub>n</sub> (sequential mass spectrometry) scans. The scan range was 70-1000 m/z and varied somewhat across technologies.

### B. Identification and Classification of Metabolites

At Metabolon, metabolites were recognized using an automated comparison of the ion features to a referent library of chemical standard records including preferred adducts, retention time, molecular weight (m/z), and in-source fragments in addition to related MS spectra. Also, the in-house software developed by Metabolon was used to implement the visual inspection for quality control (QC) in order to curate the metabolites [3,4]. The identification of recognized chemical entities was based on a comparison to purified standards' metabolomic library entries. The detectable properties of commercially available purified standard substances have been determined. For structurally unidentified biochemicals that have been recognized due to their recurrence, new mass spectral entries

have been established (both chromatographic and mass spectral). The area-under-the-curve method was used to calculate the peaks.

In total, 1,136 metabolites were discovered, including 782 known and 354 unknown metabolites. Finally, 640 analyzable metabolites were verified as only known metabolites with missing rates  $\leq 25\%$  were regarded for quality control. Missing data for the metabolites were imputed to half of the lowest value [5,6].

(a)

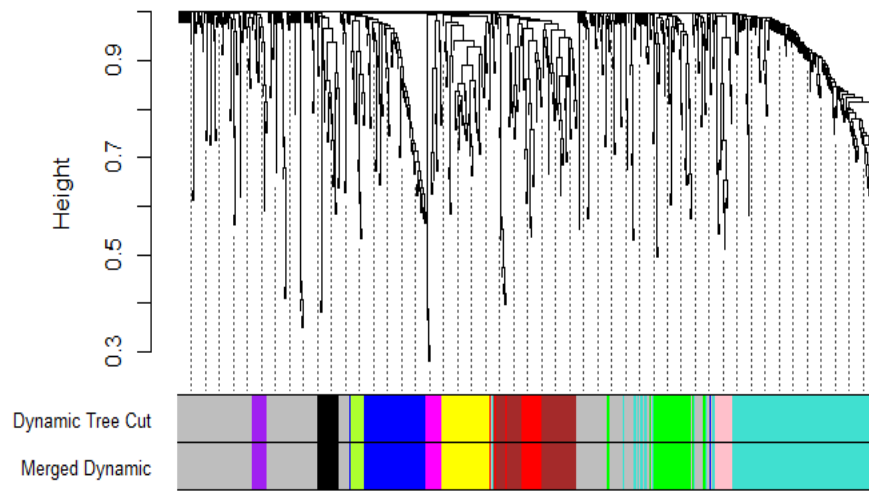

(b)

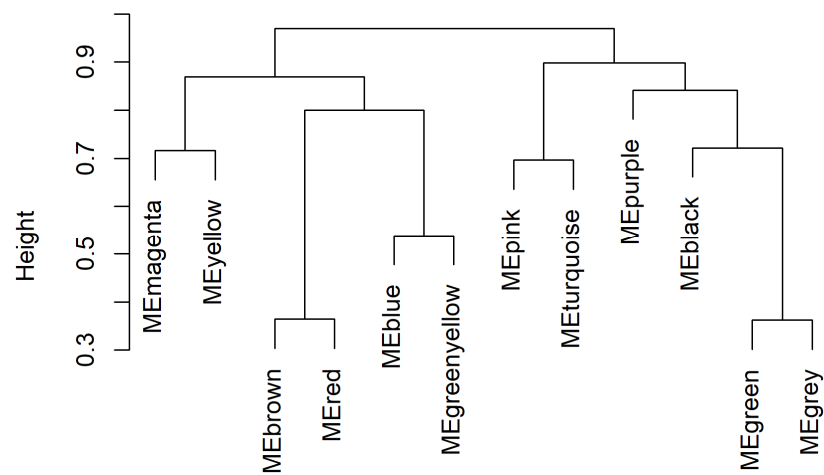

**Figure S1.** (a) Clustering dendrograms of metabolites, with dissimilarity based on topological overlap, along with assigned module colors. 12 co-expression colored modules were established; (b) eigengene dendrogram constructed by proximities of module

**Module-trait relationships**

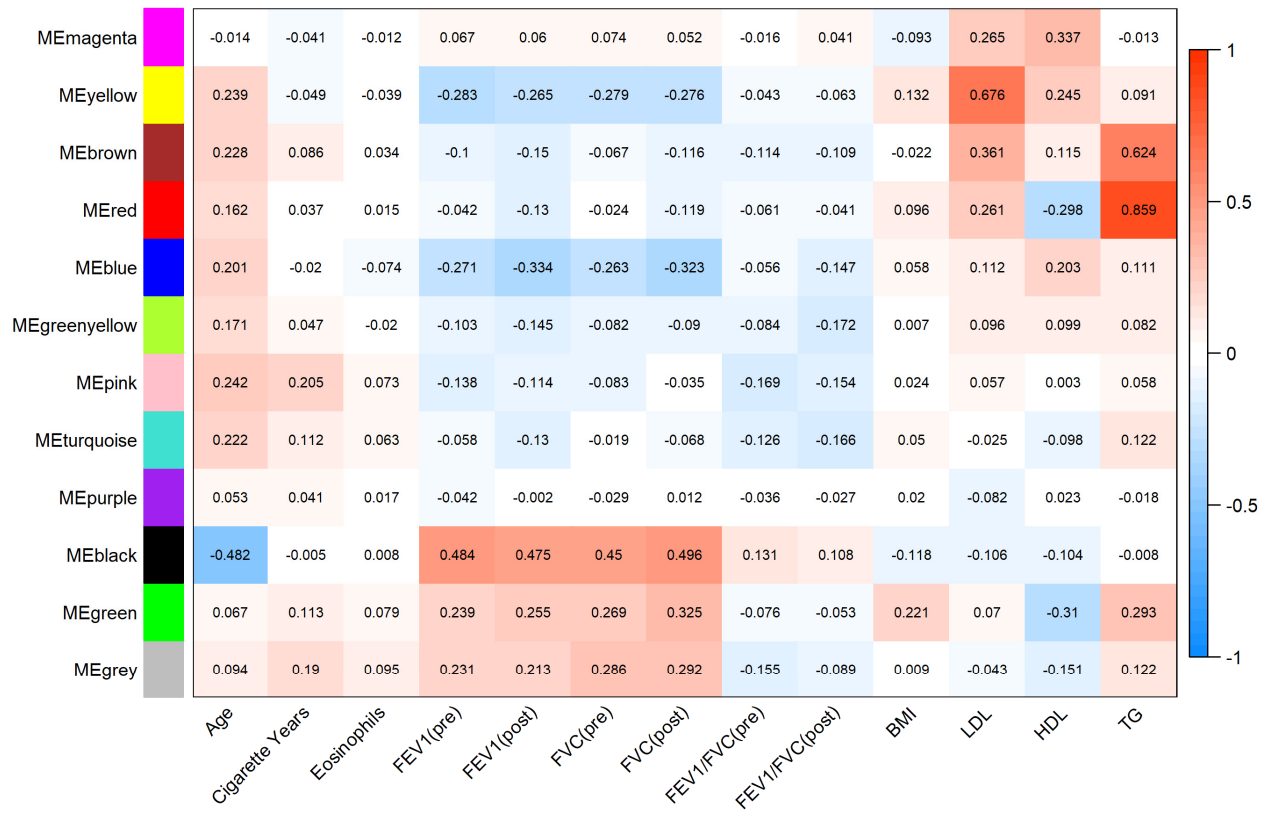

**Figure S2.** Module-trait relationship heatmap. Each row represents a module eigengene and each column to a trait. A stronger positive correlation between a module eigengene and a trait is displayed in darker red, and a stronger negative in darker blue.

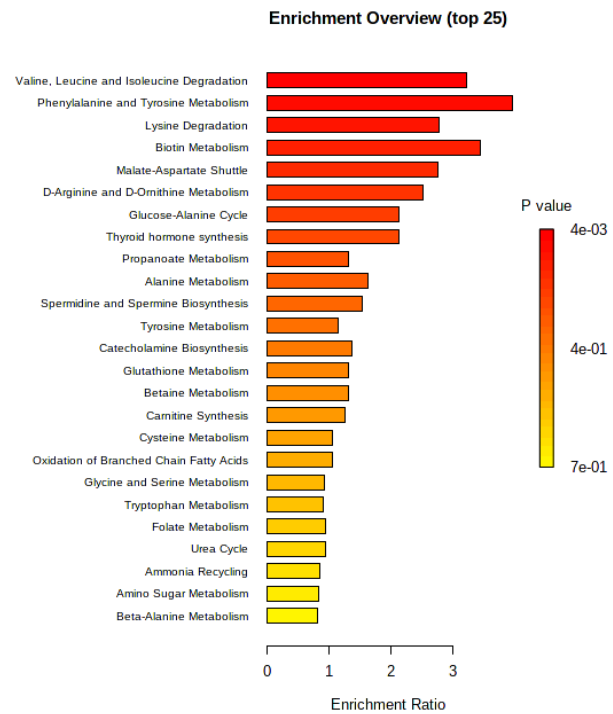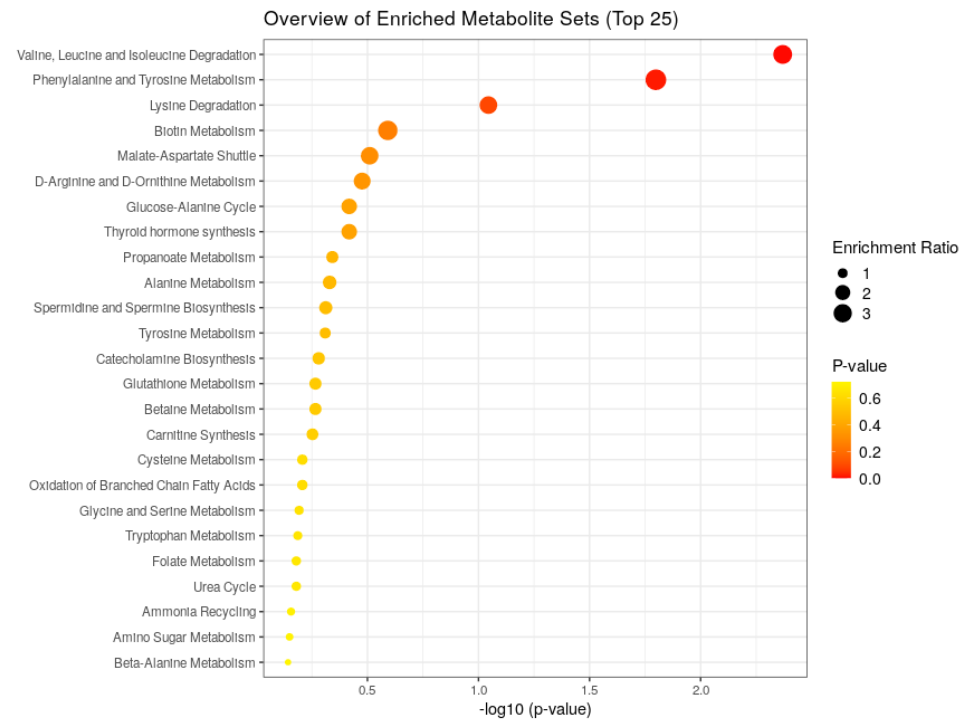

**Figure S3.** Over-representation analysis of the 40 metabolites in Green module

(a)

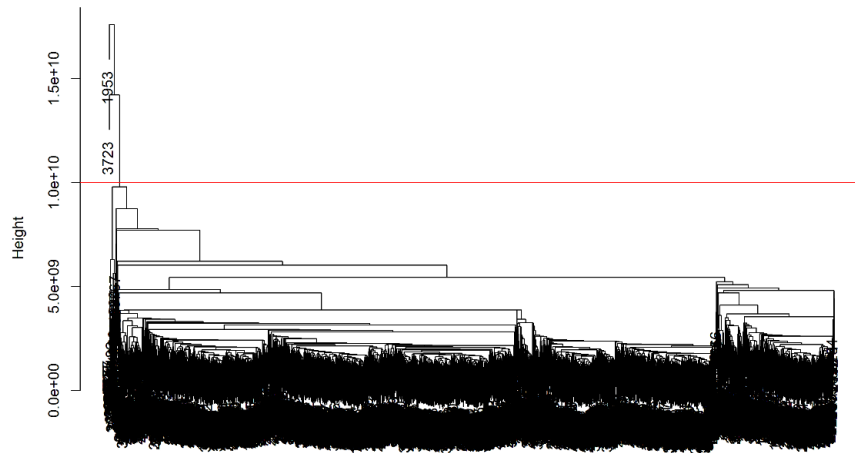

(b)

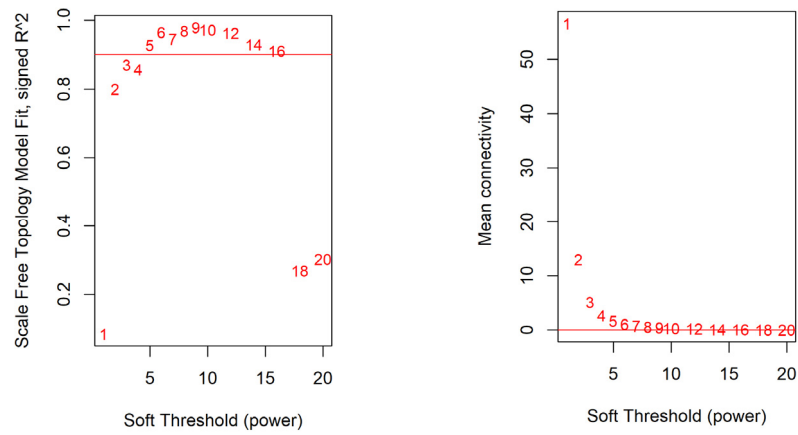

**Figure S4.** (a) Outliers detection by *SampleTree* function of WGCNA. Two outliers (1953, and 3723) were identified and removed; (b) analysis of network topology for a set of soft-thresholding powers

**Table S1.** Demographic Characteristics of the Samples in Study Used for the Heatmap of the Pearson Correlation Test (N = 3,347)

|                                                           | <b>Asthma<br/>(N=514)</b> | <b>Non-asthma<br/>(N = 2,833)</b> | <b><i>p</i>-value</b> |
|-----------------------------------------------------------|---------------------------|-----------------------------------|-----------------------|
| <b>Cigarette Pack Years, Cigarette-Years<sup>1)</sup></b> | 9.34 ± 18.66              | 5.75 ± 13.90                      | <0.001                |
| <b>Eosinophils, Counts</b>                                | 0.22 ± 0.16               | 0.19 ± 0.18                       | <0.001                |
| <b>Pulmonary Function Measures</b>                        |                           |                                   |                       |
| pre FEV1, mL                                              | 2550 ± 836                | 2929 ± 785                        | <0.001                |
| pre FVC, mL                                               | 3277 ± 376                | 3635 ± 980                        | <0.001                |
| pre FEV1/FVC, %                                           | 77.4 ± 9.56               | 80.77 ± 6.36                      | <0.001                |
| post FEV1, mL                                             | 2278 ± 902                | 2730 ± 800                        | <0.001                |
| post FVC, mL                                              | 3393 ± 1136               | 3829 ± 990                        | 0.004                 |
| post FEV1/FVC, %                                          | 66.7 ± 10.41              | 71.0 ± 8.27                       | 0.001                 |

<sup>1)</sup> The number of exposure years multiplied by the average number of cigarettes smoked per day



**Table S2.** The Number of Metabolites in 12 Modules

| Module Colors | Frequency |
|---------------|-----------|
| Black         | 20        |
| Blue          | 59        |
| Brown         | 57        |
| Green         | 40        |
| Green-Yellow  | 13        |
| Grey          | 191       |
| Magenta       | 15        |
| Pink          | 15        |
| Purple        | 14        |
| Red           | 21        |
| Turquoise     | 151       |
| Yellow        | 44        |
| Total         | 640       |

**Table S3.** Association between Colored Modules and Asthma

| Module       | Model (1)             | Model (2)            | Model (3)            | Model (4)            |
|--------------|-----------------------|----------------------|----------------------|----------------------|
| Green        | 1.28*<br>(1.10, 1.49) | 1.25<br>(1.07, 1.47) | 1.25<br>(1.07, 1.46) | 1.15<br>(0.97, 1.36) |
| Grey         | 1.14<br>(0.96, 1.36)  | 1.15<br>(0.96, 1.37) | 1.10<br>(0.93, 1.30) | 1.12<br>(0.94, 1.33) |
| Green-yellow | 1.07<br>(0.95, 1.21)  | 1.08<br>(0.95, 1.22) | 1.09<br>(0.96, 1.23) | 1.09<br>(0.96, 1.23) |
| Red          | 1.10<br>(0.96, 1.25)  | 1.01<br>(0.79, 1.28) | 1.02<br>(0.80, 1.32) | 1.02<br>(0.80, 1.31) |
| Purple       | 1.02<br>(0.91, 1.14)  | 1.03<br>(0.92, 1.16) | 1.01<br>(0.90, 1.13) | 1.01<br>(0.90, 1.14) |
| Brown        | 1.04<br>(0.91, 1.18)  | 1.00<br>(0.81, 1.23) | 0.98<br>(0.80, 1.21) | 1.01<br>(0.82, 1.24) |
| Pink         | 1.00<br>(0.88, 1.14)  | 1.00<br>(0.88, 1.14) | 0.97<br>(0.85, 1.10) | 0.97<br>(0.86, 1.10) |
| Yellow       | 1.00<br>(0.85, 1.17)  | 1.02<br>(0.84, 1.23) | 1.05<br>(0.86, 1.27) | 0.95<br>(0.78, 1.15) |
| Turquoise    | 0.95<br>(0.84, 1.07)  | 0.93<br>(0.82, 1.05) | 0.91<br>(0.80, 1.04) | 0.93<br>(0.81, 1.05) |
| Blue         | 0.94<br>(0.82, 1.07)  | 0.94<br>(0.82, 1.07) | 0.95<br>(0.83, 1.08) | 0.93<br>(0.81, 1.07) |
| Magenta      | 0.92<br>(0.78, 1.09)  | 0.94<br>(0.79, 1.13) | 0.94<br>(0.78, 1.13) | 0.93<br>(0.79, 1.10) |
| Black        | 0.89<br>(0.74, 1.07)  | 0.89<br>(0.74, 1.07) | 0.86<br>(0.72, 1.03) | 0.87<br>(0.73, 1.05) |

Odds ratio with 95% confidence interval in parentheses

Bonferroni adjusted p-values: \*\*\*  $p < 0.001$ , \*\*  $p < 0.01$ , \*  $p < 0.05$ 

**Model 1** included age, sex, immigration status, field center, years of living in the U.S., and Hispanic/Latino backgrounds; **Model 2** additionally adjusted for LDL, HDL, and TG; **Model 3** supplemented smoking, education level, and household income; and **Model 4** added BMI.

**Table S4.** Pathways and Metabolites Classification of Green Module

| Super Pathways | Sub Pathways                                         | Metabolites                                                                                                                                                                                                                                                                                                                         | Counts <sup>1)</sup> |
|----------------|------------------------------------------------------|-------------------------------------------------------------------------------------------------------------------------------------------------------------------------------------------------------------------------------------------------------------------------------------------------------------------------------------|----------------------|
| Amino Acid     | Glutamate Metabolism                                 | glutamate*                                                                                                                                                                                                                                                                                                                          | 1                    |
|                | Glutathione Metabolism                               | 2-aminobutyrate, 2-hydroxybutyrate/2-hydroxyisobutyrate                                                                                                                                                                                                                                                                             | 2                    |
|                | Leucine, Isoleucine and Valine Metabolism            | 2-hydroxy-3-methylvalerate, 3-hydroxyisobutyrate, 3-methyl-2-oxobutyrate*, 3-methyl-2-oxovalerate*, 4-methyl-2-oxopentanoate, alpha-hydroxyisocaproate, alpha-hydroxyisovalerate, beta-hydroxyisovalerate, isoleucine*, isovaleryl carnitine (C5)*, leucine*, valine*                                                               | 12                   |
|                | Lysine Metabolism                                    | 2-aminoadipate*, lysine                                                                                                                                                                                                                                                                                                             | 2                    |
|                | Methionine, Cysteine, SAM and Taurine Metabolism     | methionine                                                                                                                                                                                                                                                                                                                          | 1                    |
|                | Phenylalanine Metabolism                             | phenylalanine*, phenyllactate (PLA)                                                                                                                                                                                                                                                                                                 | 2                    |
|                | Tryptophan Metabolism                                | indolelactate, tryptophan*                                                                                                                                                                                                                                                                                                          | 2                    |
|                | Tyrosine Metabolism                                  | 3-(4-hydroxyphenyl)lactate, 4-hydroxyphenylpyruvate*, tyrosine*                                                                                                                                                                                                                                                                     | 3                    |
|                | Urea cycle; Arginine and Proline Metabolism          | ornithine                                                                                                                                                                                                                                                                                                                           | 1                    |
| Lipid          | Fatty Acid Metabolism (also BCAA Metabolism)         | propionyl carnitine (C3)                                                                                                                                                                                                                                                                                                            | 1                    |
| Nucleotide     | Purine Metabolism, (Hypo)Xanthine/Inosine containing | urate                                                                                                                                                                                                                                                                                                                               | 1                    |
| Peptide        | Gamma-glutamyl Amino Acid                            | gamma-glutamyl-2-aminobutyrate, gamma-glutamyl-alpha-lysine, gamma-glutamyl-epsilon-lysine, gamma-glutamylglutamate*, gamma-glutamylhistidine, gamma-glutamylisoleucine*, gamma-glutamylleucine*, gamma-glutamylmethionine, gamma-glutamylphenylalanine*, gamma-glutamyltryptophan*, gamma-glutamyltyrosine*, gamma-glutamylvaline* | 12                   |

1) In total, 40 metabolites are in Green module.

\* Metabolites whose raw *p*-values are less than 0.05 on Model 3 of the single metabolite analysis

**Table S5.** Over-Representation Analysis of the 40 Metabolites in Green Module

|                                            | total | expected | hits | Raw p   | Holm p | FDR   |
|--------------------------------------------|-------|----------|------|---------|--------|-------|
| Valine, Leucine and Isoleucine Degradation | 60    | 2.17     | 7    | 0.00427 | 0.418  | 0.418 |
| Phenylalanine and Tyrosine Metabolism      | 28    | 1.01     | 4    | 0.0159  | 1      | 0.777 |
| Lysine Degradation                         | 30    | 1.08     | 3    | 0.0902  | 1      | 1     |
| Biotin Metabolism                          | 8     | 0.289    | 1    | 0.256   | 1      | 1     |
| Malate-Aspartate Shuttle                   | 10    | 0.361    | 1    | 0.309   | 1      | 1     |
| D-Arginine and D-Ornithine Metabolism      | 11    | 0.397    | 1    | 0.334   | 1      | 1     |
| Glucose-Alanine Cycle                      | 13    | 0.47     | 1    | 0.382   | 1      | 1     |
| Thyroid hormone synthesis                  | 13    | 0.47     | 1    | 0.382   | 1      | 1     |
| Propanoate Metabolism                      | 42    | 1.52     | 2    | 0.455   | 1      | 1     |
| Alanine Metabolism                         | 17    | 0.614    | 1    | 0.468   | 1      | 1     |
| Spermidine and Spermine Biosynthesis       | 18    | 0.65     | 1    | 0.487   | 1      | 1     |
| Tyrosine Metabolism                        | 72    | 2.6      | 3    | 0.49    | 1      | 1     |
| Catecholamine Biosynthesis                 | 20    | 0.723    | 1    | 0.524   | 1      | 1     |
| Glutathione Metabolism                     | 21    | 0.759    | 1    | 0.542   | 1      | 1     |
| Betaine Metabolism                         | 21    | 0.759    | 1    | 0.542   | 1      | 1     |
| Carnitine Synthesis                        | 22    | 0.795    | 1    | 0.559   | 1      | 1     |
| Cysteine Metabolism                        | 26    | 0.939    | 1    | 0.621   | 1      | 1     |
| Oxidation of Branched Chain Fatty Acids    | 26    | 0.939    | 1    | 0.621   | 1      | 1     |
| Glycine and Serine Metabolism              | 59    | 2.13     | 2    | 0.642   | 1      | 1     |
| Tryptophan Metabolism                      | 60    | 2.17     | 2    | 0.651   | 1      | 1     |
| Folate Metabolism                          | 29    | 1.05     | 1    | 0.661   | 1      | 1     |
| Urea Cycle                                 | 29    | 1.05     | 1    | 0.661   | 1      | 1     |
| Ammonia Recycling                          | 32    | 1.16     | 1    | 0.698   | 1      | 1     |
| Amino Sugar Metabolism                     | 33    | 1.19     | 1    | 0.709   | 1      | 1     |
| Beta-Alanine Metabolism                    | 34    | 1.23     | 1    | 0.72    | 1      | 1     |
| Aspartate Metabolism                       | 35    | 1.26     | 1    | 0.73    | 1      | 1     |
| Nicotinate and Nicotinamide Metabolism     | 37    | 1.34     | 1    | 0.75    | 1      | 1     |
| Purine Metabolism                          | 74    | 2.67     | 2    | 0.764   | 1      | 1     |
| Methionine Metabolism                      | 43    | 1.55     | 1    | 0.801   | 1      | 1     |
| Histidine Metabolism                       | 43    | 1.55     | 1    | 0.801   | 1      | 1     |
| Glutamate Metabolism                       | 49    | 1.77     | 1    | 0.842   | 1      | 1     |
| Arginine and Proline Metabolism            | 53    | 1.92     | 1    | 0.865   | 1      | 1     |
| Warburg Effect                             | 58    | 2.1      | 1    | 0.889   | 1      | 1     |
| Arachidonic Acid Metabolism                | 69    | 2.49     | 1    | 0.928   | 1      | 1     |

**Table S6.** Stratification Analysis of Green module and 1-arachidonoyl-GPA (20:4) by Sex and Hispanic/Latino Backgrounds

|                                    |                                    | Cases/Controls | Model (1)               | Model (2)               | Model (3)               | Model (4)              |
|------------------------------------|------------------------------------|----------------|-------------------------|-------------------------|-------------------------|------------------------|
| <i>Sex</i>                         |                                    |                |                         |                         |                         |                        |
| Green Module                       | Female                             | 343/1561       | 1.41***<br>(1.22, 1.64) | 1.36***<br>(1.17, 1.59) | 1.37***<br>(1.17, 1.60) | 1.27**<br>(1.08, 1.49) |
|                                    | Male                               | 171/1272       | 1.00<br>(0.83, 1.21)    | 1.05<br>(0.87, 1.27)    | 1.04<br>(0.86, 1.25)    | 1.04<br>(0.85, 1.26)   |
| 1-arachidonoyl-GPA (20:4)          | Female                             | 343/1561       | 1.23***<br>(1.09, 1.38) | 1.22***<br>(1.08, 1.37) | 1.24***<br>(1.10, 1.40) | 1.21**<br>(1.07, 1.37) |
|                                    | Male                               | 171/1272       | 1.12<br>(0.95, 1.32)    | 1.15<br>(0.96, 1.35)    | 1.13<br>(0.95, 1.34)    | 1.13<br>(0.95, 1.34)   |
| <i>Hispanic/Latino Backgrounds</i> |                                    |                |                         |                         |                         |                        |
| Green Module                       | Cuban and Puerto-Rican Backgrounds | 317/849        | 1.27**<br>(1.09, 1.47)  | 1.26**<br>(1.08, 1.48)  | 1.27**<br>(1.09, 1.49)  | 1.24**<br>(1.06, 1.47) |
|                                    | Others                             | 197/1984       | 1.21*<br>(1.02, 1.45)   | 1.20*<br>(1.00, 1.44)   | 1.20<br>(1.00, 1.44)    | 1.10<br>(0.90, 1.33)   |
| 1-arachidonoyl-GPA (20:4)          | Cuban and Puerto-Rican Backgrounds | 317/849        | 1.26***<br>(1.10, 1.44) | 1.26***<br>(1.10, 1.44) | 1.25**<br>(1.09, 1.43)  | 1.24**<br>(1.08, 1.42) |
|                                    | Others                             | 197/1984       | 1.14<br>(0.99, 1.30)    | 1.15*<br>(1.00, 1.31)   | 1.15*<br>(1.00, 1.32)   | 1.13<br>(0.98, 1.29)   |

Odds ratio with 95% confidence interval in parentheses

\*\*\*  $p < 0.001$ , \*\*  $p < 0.01$ , \*  $p < 0.05$ 

**Model 1** included age, sex, immigration status, field center, years of living in the U.S., and Hispanic/Latino backgrounds; **Model 2** additionally adjusted for LDL, HDL, and TG; **Model 3** supplemented smoking, education level, and household income; and **Model 4** added BMI.

**Table S7.** Interaction Effects of Green module and 1-arachidonoyl-GPA (20:4) by Sex and Hispanic/Latino Backgrounds

| Green Module              |       |       |       |       |         |         |                                    |       |        |       |         |         |
|---------------------------|-------|-------|-------|-------|---------|---------|------------------------------------|-------|--------|-------|---------|---------|
| Model                     | Sex   |       |       |       |         |         | Hispanic/Latino Backgrounds        |       |        |       |         |         |
|                           | Men   |       | Women |       | z score | p-value | Cuban and Puerto-Rican Backgrounds |       | Others |       | z score | p-value |
|                           | beta  | s.e.  | beta  | s.e.  |         |         | beta                               | s.e.  | beta   | s.e.  |         |         |
| 1                         | 0.004 | 0.094 | 0.346 | 0.075 | 113.53  | <0.001  | 0.236                              | 0.094 | 0.194  | 0.075 | 13.23   | <0.001  |
| 2                         | 0.049 | 0.097 | 0.310 | 0.079 | 83.74   | <0.001  | 0.233                              | 0.080 | 0.184  | 0.093 | 16.05   | <0.001  |
| 3                         | 0.035 | 0.097 | 0.313 | 0.079 | 88.52   | <0.001  | 0.243                              | 0.080 | 0.184  | 0.094 | 18.96   | <0.001  |
| 4                         | 0.036 | 0.100 | 0.239 | 0.082 | 62.65   | <0.001  | 0.219                              | 0.083 | 0.094  | 0.100 | 38.73   | <0.001  |
| 1-arachidonoyl-GPA (20:4) |       |       |       |       |         |         |                                    |       |        |       |         |         |
| 1                         | 0.116 | 0.085 | 0.204 | 0.060 | 33.56   | <0.001  | 0.227                              | 0.068 | 0.130  | 0.070 | 38.76   | <0.001  |
| 2                         | 0.136 | 0.087 | 0.199 | 0.060 | 23.51   | <0.001  | 0.228                              | 0.069 | 0.138  | 0.070 | 35.96   | <0.001  |
| 3                         | 0.121 | 0.088 | 0.214 | 0.062 | 34.46   | <0.001  | 0.223                              | 0.070 | 0.142  | 0.071 | 31.75   | <0.001  |
| 4                         | 0.121 | 0.088 | 0.194 | 0.062 | 27.10   | <0.001  | 0.214                              | 0.070 | 0.120  | 0.072 | 36.40   | <0.001  |

**Model 1** included age, sex, immigration status, field center, years of living in the U.S., and Hispanic/Latino backgrounds; **Model 2** additionally adjusted for LDL, HDL, and TG; **Model 3** supplemented smoking, education level, and household income; and **Model 4** added BMI.

**Table S8.** The List of 1-arachidonoyl-GPA (20:4) and 40 Metabolites in Green Module by LC/MS Analysis

| Metabolite                             | Platform        | RI     | MASS     | CAS ID                   | PUB<br>CHEM | KEGG   | HMDB      | SMILES                                                                   |
|----------------------------------------|-----------------|--------|----------|--------------------------|-------------|--------|-----------|--------------------------------------------------------------------------|
| 1-arachidonoyl-GPA (20:4)              | LC/MS Neg       | 5499   | 457.2361 | 799268-65-8              | NA          | NA     | NA        | <chem>CCCCC\C=C/C/C=C\C/C=C\C/C=C\C/C=C\CCCC(OCC(O)COP(O)(O)=O)=O</chem> |
| 2-aminoadipate                         | LC/MS Neg       | 639.2  | 160.0615 | 542-32-5;<br>1118-90-7   | 469         | C00956 | HMDB00510 | <chem>OC(CCCC(N)C(O)=O)=O</chem>                                         |
| 2-aminobutyrate                        | LC/MS Pos Early | 2059   | 104.0706 | 1492-24-6                | 439691      | C02261 | HMDB00650 | <chem>N[C@H](CC)C(O)=O</chem>                                            |
| 2-hydroxy-3-methylvalerate             | LC/MS Neg       | 1800   | 131.0714 | 488-15-3                 | 164623      | NA     | HMDB00317 | <chem>O=C(C(C(CC)C)O)O</chem>                                            |
| 2-hydroxybutyrate/2-hydroxyisobutyrate | LC/MS Polar     | 1258   | 103.0401 | NA                       | NA          | NA     | NA        | <chem>CCC(O)C(O)=O</chem>                                                |
| 3-(4-hydroxyphenyl)lactate             | LC/MS Neg       | 1379   | 181.0506 | 6482-98-0                | 9378        | C03672 | HMDB00755 | <chem>OC(C(O)=O)CC1=CC=C(O)C=C1</chem>                                   |
| 3-hydroxyisobutyrate                   | LC/MS Polar     | 1619   | 103.0401 | 2068-83-9                | 87          | C06001 | HMDB00336 | <chem>CC(C(O)=O)CO</chem>                                                |
| 3-methyl-2-oxobutyrate                 | LC/MS Neg       | 1465   | 115.0401 | 3715-29-5                | 49          | C00141 | HMDB00019 | <chem>OC(C(C(C)C)=O)=O</chem>                                            |
| 3-methyl-2-oxovalerate                 | LC/MS Neg       | 2064.2 | 129.0557 | 1460-34-0;<br>51829-07-3 | 47          | C00671 | HMDB03736 | <chem>CCC(C)C(C(O)=O)=O</chem>                                           |
| 4-hydroxyphenylpyruvate                | LC/MS Neg       | 1690   | 179.035  | 156-39-8                 | 979         | C01179 | HMDB00707 | <chem>OC1=CC=C(CC(C(O)=O)=O)C=C1</chem>                                  |
| 4-methyl-2-oxopentanoate               | LC/MS Neg       | 2170   | 129.0557 | 816-66-0                 | 70          | C00233 | HMDB00695 | <chem>CC(C)CC(C(O)=O)=O</chem>                                           |
| alpha-hydroxyisocaproate               | LC/MS Neg       | 1840   | 131.0714 | 10303-64-7               | 83697       | C03264 | HMDB00746 | <chem>OC(C(CC(C)C)O)=O</chem>                                            |
| alpha-hydroxyisovalerate               | LC/MS Polar     | 1052   | 117.0557 | 600-37-3                 | 99823       | NA     | HMDB00407 | <chem>OC(C(O)=O)C(C)C</chem>                                             |
| beta-hydroxyisovalerate                | LC/MS Neg       | 1027   | 117.0557 | 625-08-1                 | 69362       | NA     | HMDB00754 | <chem>CC(C)(O)CC(O)=O</chem>                                             |
| gamma-glutamyl-2-aminobutyrate         | LC/MS Pos Early | 2380   | 233.1132 | 16869-42-4               | NA          | NA     | NA        | <chem>CCC(C(=O)[O-])NC(=O)CCC(C(=O)[O-])[NH3+]</chem>                    |
| gamma-glutamyl-alpha-lysine            | LC/MS Pos Early | 2784   | 276.1554 | NA                       | 65254       | NA     | NA        | <chem>O=C(N[C@@H](CCCCN)C(O)=O)CC[C@H](N)C(O)=O</chem>                   |
| gamma-glutamyl-epsilon-lysine          | LC/MS Pos Early | 2717   | 276.1554 | 17105-15-6               | 7015685     | NA     | HMDB03869 | <chem>N[C@H](C(O)=O)CCCCNC(CC[C@@H](C(O)=O)N)=O</chem>                   |
| gamma-glutamylglutamate                | LC/MS Pos Early | 1775   | 277.103  | 1116-22-9                | 92865       | C05282 | HMDB11737 | <chem>O=C(O)C(N)CCC(NC(C(O)=O)CCC(O)=O)=O</chem>                         |
| gamma-glutamylhistidine                | LC/MS Pos Early | 2740   | 285.1194 | 37460-15-4               | 7017195     | NA     | NA        | <chem>O=C(O)[C@@H](N)CCC(N[C@@H](CC1=CNC=N1)C(O)=O)=O</chem>             |
| gamma-glutamylisoleucine*              | LC/MS Pos Early | 2940   | 261.1445 | NA                       | 14253342    | NA     | HMDB11170 | <chem>CCC(C)[C@@H](C(O)=O)NC(CC[C@@H](C(O)=O)N)=O</chem>                 |

|                             |                 |       |          |                      |         |        |           |                                                                      |
|-----------------------------|-----------------|-------|----------|----------------------|---------|--------|-----------|----------------------------------------------------------------------|
| gamma-glutamylleucine       | LC/MS Pos Early | 2991  | 261.1445 | 2566-39-4            | 151023  | NA     | HMDB11171 | <chem>CC(C)C[C@@H](C(O)=O)NC(C[C@@H](C(O)=O)N)=O</chem>              |
| gamma-glutamylmethionine    | LC/MS Pos Early | 2640  | 279.1009 | 17663-87-5           | 7009567 | NA     | HMDB29155 | <chem>O=C(O)[C@H](CCSC)NC(CC[C@@H](C(O)=O)N)=O</chem>                |
| gamma-glutamylphenylalanine | LC/MS Pos Early | 2992  | 295.1289 | 7432-24-8            | 111299  | NA     | HMDB00594 | <chem>O=C(O)[C@H](CC1=CC=CC=C1)NC(CC[C@@H](C(O)=O)N)=O</chem>        |
| gamma-glutamyltryptophan    | LC/MS Pos Early | 2975  | 334.1398 | 66471-20-3           | 3989307 | NA     | HMDB29160 | <chem>O=C(O)[C@@H](N)CCC(N[C@@H](CC1=CNC2=C1C=CC=C2)C(O)=O)=O</chem> |
| gamma-glutamyltyrosine      | LC/MS Neg       | 1240  | 309.1092 | 7432-23-7            | 94340   | NA     | HMDB11741 | <chem>OC(C=C1)=CC=C1C[C@@H](C(O)=O)NC(CC[C@@H](C(O)=O)N)=O</chem>    |
| gamma-glutamylvaline        | LC/MS Pos Early | 2700  | 247.1289 | 2746-34-1            | 7015683 | NA     | HMDB11172 | <chem>O=C(N[C@H]([C@@](O)=O)C(C)C)CC[C@@H]([C@](O)=O)N</chem>        |
| glutamate                   | LC/MS Pos Early | 1500  | 148.0604 | 56-86-0              | 611     | C00025 | HMDB00148 | <chem>O=C(O)[C@@H](N)CCC(O)=O</chem>                                 |
| indolelactate               | LC/MS Neg       | 2286  | 204.0666 | 832-97-3             | 92904   | C02043 | HMDB00671 | <chem>OC(C(O)=O)CC1=CNC2=C1C=CC=C2</chem>                            |
| isoleucine                  | LC/MS Pos Early | 2800  | 132.1019 | 73-32-5              | 6306    | C00407 | HMDB00172 | <chem>NC(C(O)=O)C(C)CC</chem>                                        |
| isovalerylcarnitine (C5)    | LC/MS Pos Early | 3085  | 246.17   | 31023-24-2           | 6426851 | NA     | HMDB00688 | <chem>[O-]C(CC(C[N+](C)(C)C)OC(CC(C)C)=O)=O</chem>                   |
| leucine                     | LC/MS Pos Early | 2864  | 132.1019 | 61-90-5              | 6106    | C00123 | HMDB00687 | <chem>O=C([C@H](CC(C)C)N)O</chem>                                    |
| lysine                      | LC/MS Pos Early | 2850  | 147.1128 | 56-87-1              | 5962    | C00047 | HMDB00182 | <chem>NC(C(O)=O)CCCCN</chem>                                         |
| methionine                  | LC/MS Pos Early | 2526  | 150.0583 | 63-68-3              | 6137    | C00073 | HMDB00696 | <chem>CSCCC(N)C(O)=O</chem>                                          |
| ornithine                   | LC/MS Pos Early | 2800  | 133.0972 | 3184-13-2            | 6262    | C00077 | HMDB03374 | <chem>O=C(O)[C@H](N)CCCN</chem>                                      |
| phenylalanine               | LC/MS Pos Early | 2878  | 166.0863 | 63-91-2              | 6140    | C00079 | HMDB00159 | <chem>NC(C(O)=O)CC1=CC=CC=C1</chem>                                  |
| phenyllactate (PLA)         | LC/MS Neg       | 2208  | 165.0557 | 828-01-3             | 3848    | C05607 | HMDB00779 | <chem>OC(C(O)=O)CC1=CC=CC=C1</chem>                                  |
| propionylcarnitine (C3)     | LC/MS Pos Early | 2590  | 218.1387 | 17298-37-2           | 107738  | C03017 | HMDB00824 | <chem>[O-]C(CC(OC(CC)=O)C[N+](C)(C)C)=O</chem>                       |
| tryptophan                  | LC/MS Pos Early | 2986  | 205.0972 | 73-22-3              | 6305    | C00078 | HMDB00929 | <chem>O=C(O)[C@@H](N)CC1=CNC2=C1C=CC=C2</chem>                       |
| tyrosine                    | LC/MS Pos Early | 2430  | 182.0812 | 60-18-4              | 6057    | C00082 | HMDB00158 | <chem>N[C@@H](CC1=CC=C(O)C=C1)C(O)=O</chem>                          |
| urate                       | LC/MS Neg       | 757.1 | 167.0211 | 69-93-2;<br>120K5305 | 1175    | C00366 | HMDB00289 | <chem>O=C1NC(NC(NC2=O)=O)=C2N1</chem>                                |
| valine                      | LC/MS Pos Early | 2479  | 118.0863 | 72-18-4              | 6287    | C00183 | HMDB00883 | <chem>N[C@H](C(O)=O)C(C)C</chem>                                     |

RI: Relative intensity; CAS ID: Chemical Abstracts Service Identification number; SMILE: SMAll Incision Lenticule Extraction



**Table S9.** Scale Free Metrics Resulting from *pickSoftThreshold* Function of WGCNA

|    | Power | SFT.R.sq | slope  | truncated.R.sq | mean.k. | median.k. | max.k. |
|----|-------|----------|--------|----------------|---------|-----------|--------|
| 1  | 1     | 0.086    | -0.478 | 0.872          | 56.6    | 55.1      | 117    |
| 2  | 2     | 0.8      | -1.18  | 0.975          | 13      | 10.6      | 48.1   |
| 3  | 3     | 0.87     | -1.38  | 0.89           | 5.15    | 3.39      | 28.7   |
| 4  | 4     | 0.858    | -1.47  | 0.837          | 2.71    | 1.48      | 19.4   |
| 5  | 5     | 0.928    | -1.39  | 0.917          | 1.66    | 0.726     | 13.8   |
| 6  | 6     | 0.965    | -1.36  | 0.956          | 1.11    | 0.428     | 10.2   |
| 7  | 7     | 0.945    | -1.38  | 0.933          | 0.781   | 0.254     | 7.91   |
| 8  | 8     | 0.969    | -1.36  | 0.961          | 0.575   | 0.165     | 6.21   |
| 9  | 9     | 0.979    | -1.33  | 0.974          | 0.437   | 0.106     | 4.93   |
| 10 | 10    | 0.972    | -1.34  | 0.967          | 0.34    | 0.0684    | 4.08   |
| 11 | 12    | 0.963    | -1.36  | 0.965          | 0.218   | 0.0337    | 3.04   |
| 12 | 14    | 0.929    | -1.43  | 0.94           | 0.148   | 0.0171    | 2.38   |
| 13 | 16    | 0.911    | -1.43  | 0.916          | 0.105   | 0.00769   | 1.96   |
| 14 | 18    | 0.269    | -2.17  | 0.117          | 0.0773  | 0.00361   | 1.67   |
| 15 | 20    | 0.303    | -2.2   | 0.239          | 0.0586  | 0.00173   | 1.46   |

## Supplementary reference

1. Feofanova, E.V.; Chen, H.; Dai, Y.; Jia, P.; Grove, M.L.; Morrison, A.C.; Qi, Q.; Daviglus, M.; Cai, J.; North, K.E.; et al. A Genome-wide Association Study Discovers 46 Loci of the Human Metabolome in the Hispanic Community Health Study/Study of Latinos. *Am J Hum Genet* **2020**, *107*, 849-863, doi:10.1016/j.ajhg.2020.09.003.
2. Evans AM, B.B., , Liu Q, , Mitchell MW, , Robinson RJ, , Dai H, Stewart SJ, , DeHaven CD, and Miller LAD. High Resolution Mass Spectrometry Improves Data Quantity and Quality as Compared to Unit Mass Resolution Mass Spectrometry in HighThroughput Profiling Metabolomics. *Journal of Postgenomics Drug & Biomarker Development* **2014**, *4*, doi:10.4172/2153-0769.1000132.
3. Chen, G.C.; Chai, J.C.; Yu, B.; Michelotti, G.A.; Grove, M.L.; Fretts, A.M.; Daviglus, M.L.; Garcia-Bedoya, O.L.; Thyagarajan, B.; Schneiderman, N.; et al. Serum sphingolipids and incident diabetes in a US population with high diabetes burden: the Hispanic Community Health Study/Study of Latinos (HCHS/SOL). *Am J Clin Nutr* **2020**, *112*, 57-65, doi:10.1093/ajcn/nqaa114.
4. Dehaven, C.D.; Evans, A.M.; Dai, H.; Lawton, K.A. Organization of GC/MS and LC/MS metabolomics data into chemical libraries. *J Cheminform* **2010**, *2*, 9, doi:10.1186/1758-2946-2-9.
5. Wei, R.; Wang, J.; Su, M.; Jia, E.; Chen, S.; Chen, T.; Ni, Y. Missing Value Imputation Approach for Mass Spectrometry-based Metabolomics Data. *Sci Rep* **2018**, *8*, 663, doi:10.1038/s41598-017-19120-0.
6. Playdon, M.C.; Joshi, A.D.; Tabung, F.K.; Cheng, S.; Henglin, M.; Kim, A.; Lin, T.; van Roekel, E.H.; Huang, J.; Krumsiek, J.; et al. Metabolomics Analytics Workflow for Epidemiological Research: Perspectives from the Consortium of Metabolomics Studies (COMETS). *Metabolites* **2019**, *9*, doi:10.3390/metabo9070145.
